# Supplementary material for: Horizontal gene transfer plays a major role in the pathological convergence of Xanthomonas lineages on common bean
Source: PubMed Central journal article supplement (PMC6090828; doi:10.1186/s12864-018-4975-4), 2018-08-13
Supplement: 12864_2018_4975_MOESM1_ESM.pdf [file 12864_2018_4975_MOESM1_ESM.pdf]

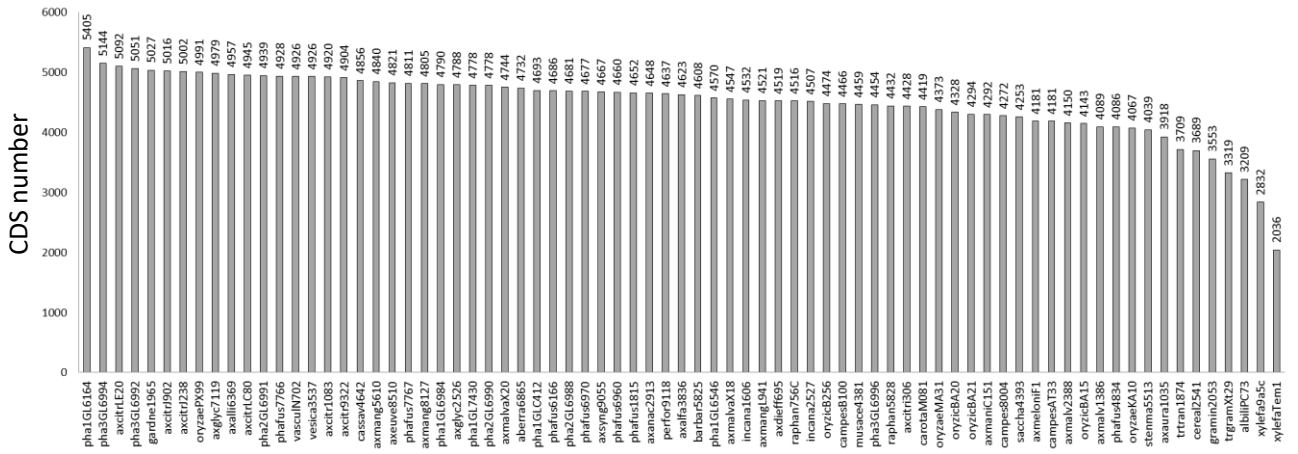

Additional file 1: CDS content per strain
