# Supplementary material for: Horizontal gene transfer plays a major role in the pathological convergence of Xanthomonas lineages on common bean
Source: BMC Genomics. 2018 Aug 13;19:606. doi: 10.1186/s12864-018-4975-4 (PMC6090828; doi:10.1186/s12864-018-4975-4)
Supplement: Supplementary file 3 — Ks analysis on 100 CDS presenting characteristics unique to CBB agents. (XLSX 64 kb) [file 12864_2018_4975_MOESM3_ESM.xlsx]

## Sheet: Feuil1
Additional file 3: Ks analysis on 100 CDS presenting characteristics unique to CBB agents.
1	2	m00100560		m00100580a		m00100580b		m00100590		m00101230		m00101980		m00102200		m00104250a		m00104250b		m00104520		m00104530		m00104540		m00104640		m00104690		m00105290		m00105330		m00105340		m00105390		m00105750		m00107500a		m00107500b		m00138140		m00109610a		m00109610b
1	2	mean Ks	SD	mean Ks	SD	mean Ks	SD	mean Ks	SD	mean Ks	SD	mean Ks	SD	mean Ks	SD	mean Ks	SD	mean Ks	SD	mean Ks	SD	mean Ks	SD	mean Ks	SD	mean Ks	SD	mean Ks	SD	mean Ks	SD	mean Ks	SD	mean Ks	SD	mean Ks	SD	mean Ks	SD	mean Ks	SD	mean Ks	SD	mean Ks	SD	mean Ks	SD	mean Ks	SD
NF1	NF2,NF3,fuscans	0.0117462	0.00583486	0.0362923	0.015206	0.0233	0.0172151	0.0273769	0.00877498	0.0284785	0.000836934	0.0465492	0.00168442	0.00152308	0.00164511	0.0569692	0.0792622	0.0843538	0.0135889	0.0469615	0.00340419	0.00339231	0.0047503	0.00380769	0.00451723	0.00321692	0.00251522	0.00256154	0.00279932	0.000953846	0.00111121	0.00613077	0.00151677	0.00585231	0.00155476	0.00245385	0.0012463	0.101146	0.00265435	0.00244615	0.00264215	0.12374	0.00105682	0.00343846	0.00222314	0.0436462	0.000723895	0.00207692	0.0022689
NF1	NF2	0.0051	1.54003e-10	0.0152	3.68138e-10	0.0436	1.04125e-09	0.0265	0	0.02888	0.000391918	0.04568	0.000391918	0.0033	7.12895e-11	0.198	3.72529e-09	0.092	0	0.0482	0	0.0118	0	0.0055	0	0.00688	0.000342929	0.005	8.23181e-11	0.0025	4.1159e-11	0.0053	0	0.00364	0.00088	0.0038	9.20344e-11	0.0963	0	0.0053	0	0.12524	0.00028	0.0046	0	0.0436	1.04125e-09	0.004	0
NF1	NF3	0.0058	0	0.0254	6.58545e-10	0.0401	0	0.0429	0	0.02714	0.000440908	0.04408	0.000391918	0.0033	7.12895e-11	0.0456	9.31323e-10	0.0597	1.14063e-09	0.0524	0	0.0029	0	0.011	0	0.00468	0.000342929	0.0061	0.000424264	0.00163333	0.000612826	0.0089	0	0.00576	0.000845222	0.0038	9.20344e-11	0.1026	0	0.0053	0	0.12224	0.00028	0.0068	1.16415e-10	0.0424	0	0.005	8.23181e-11
NF1	fuscans	0.0171429	0.000139971	0.05	0	0.0074	2.85158e-10	0.0211	0	0.02888	0.000391918	0.04798	0.000391918	0	0	0.0014	6.17385e-11	0.0916429	0.00206457	0.0441	0	0	0	0	0	0.00102	0.000391918	0	0	0	0	0.0053	1.30156e-10	0.00684	0.00088	0.0013	0	0.1026	4.9281e-09	0	0	0.12374	0.00028	0.0015	0	0.0442	0	0	0
NF1	X.citri pv. anacardii and aurantifolii	0.0051	0	0.02805	0.00085	0.044	0.0004	0.0319	8.06549e-10	0.03238	0.000391918	0.04408	0.000391918	0.0055	0.0011	0.04595	0.00035	0.06365	0.00055	0.04825	0.00415	0.0088	0	0.0071	8.23181e-11	0.00543	0.000824682	0.00585	0.00165	0.0031	0.0019	0.0505	0.0273	0.00896	0.00137928	0.0051	0.0013	0.0995	0	0.00725	0.00065	0.12485	0.000492443	0.0042	0.0004	0.0442	0.0006	0.00905	0.00205
X.phaseoli pv. manihotis	NF2,NF3,fuscans	na	na	0.0563462	0.0110255	0.5307	0.00236611	na	na	0.0465846	0.000758385	0.0476462	0.00165093	0.0607462	0.000598222	0.0777077	0.0711593	0.145731	0.0116286	0.168392	0.00202236	0.112615	0.00143251	0.110446	0.00171133	0.0436231	0.000510134	0.0504615	0.000324721	0.0723308	0.00120025	0.0828	0.00164317	0.0579462	0.000598222	0.0097	0.000648074	0.101146	0.00265435	0.101923	0.00246394	0.123954	0.000631988	0.0455692	0.00067412	0.0424462	0.000723895	0.0412231	0.0013729
X.phaseoli pv. manihotis	NF2	na	na	0.0643	0	0.5276	0	na	na	0.047	0	0.0467	0	0.0601	0	0.2055	0	0.1521	0	0.1647	0	0.1134	0	0.1089	1.31709e-09	0.0444	0	0.0506	0	0.074	0	0.0837	0	0.0573	0	0.009	0	0.0963	0	0.098	0	0.1243	0	0.0452	0	0.0424	0	0.0421	0
X.phaseoli pv. manihotis	NF3	na	na	0.0716	0	0.5345	0	na	na	0.0452	0	0.0452	0	0.0601	0	0.0617	0	0.1245	0	0.1695	0	0.11	0	0.1135	1.31709e-09	0.0429	0	0.05	0.000424264	0.0730667	0.000659966	0.0798	0	0.0573	0	0.009	0	0.1026	2.28127e-09	0.101	0	0.1228	0	0.0468	0	0.0412	4.65661e-10	0.0432	6.58545e-10
X.phaseoli pv. manihotis	fuscans	na	na	0.0464	0	0.5304	0	na	na	0.047	6.58545e-10	0.0491	9.31323e-10	0.0613	0	0.0298	3.29272e-10	0.1521	0	0.1695	1.86265e-09	0.1134	2.9451e-09	0.1098	1.31709e-09	0.0436	0	0.0506	6.58545e-10	0.0713	0	0.0837	9.31323e-10	0.0585	6.58545e-10	0.0103	0	0.1026	0	0.104	1.31709e-09	0.1243	1.86265e-09	0.0452	0	0.043	8.06549e-10	0.04	4.65661e-10
X.phaseoli pv. manihotis	X.citri pv. anacardii and aurantifolii	na	na	0.0744	0.0009	0.5297	0.0007	na	na	0.0452	0	0.0436	0	0.0613	0	0.06205	0.00035	0.1288	0.0006	0.1647	0.0048	0.1168	0	0.10985	0.00095	0.04365	0.00075	0.0497	0	0.074	0.0014	0.053	0.0151	0.05965	0.00115	0.01095	0.00065	0.0995	0	0.10325	0.00075	0.12545	0.00035	0.0456	0.0004	0.043	0.0006	0.04635	0.00105
X.phaseoli pv. syngonii and diffenbachiae	NF2,NF3,fuscans	0.0389962	0.00269151	0.0590923	0.0111106	0.03285	0.0128681	0.215785	0.00904139	0.0440923	0.000379193	0.0488077	0.0020134	0.0619462	0.00134085	0.166008	0.051444	0.113196	0.0156038	0.1518	0.00602495	0.09745	0.00873852	0.105058	0.0106827	0.0390115	0.00094841	0.0498038	0.000802151	0.0923308	0.00114984	0.0798615	0.00335652	0.0619692	0.00293359	0.01225	0.00140801	0.104296	0.00411923	0.0978385	0.00435052	0.129077	0.00224693	0.0449538	0.00189275	0.0421462	0.00222127	0.0438731	0.00208226
X.phaseoli pv. syngonii and diffenbachiae	NF2	0.0404	0.0018	0.0671	0.0009	0.04725	0.00145	0.2054	0.0034	0.0443	6.58545e-10	0.0479	0.0012	0.0613	0.0012	0.07875	0.01865	0.10755	0.01205	0.1408	0	0.1	0.0067	0.105	0.0103	0.0398	0.0008	0.05015	0.00045	0.0933	0.0014	0.08075	0.00295	0.06135	0.00285	0.01155	0.00125	0.09945	0.00315	0.0943	0.0037	0.13035	0.00225	0.0444	0.0016	0.0421	0.0021	0.0448	0.0016
X.phaseoli pv. syngonii and diffenbachiae	NF3	0.04205	0.00185	0.0744	0.0009	0.04575	0.00215	0.22625	0.00355	0.0434	0	0.04635	0.00115	0.0613	0.0012	0.20055	0.01725	0.1326	0.0081	0.1551	1.86265e-09	0.09665	0.00665	0.1063	0.0108	0.03825	0.00075	0.04865	0.000618466	0.0923667	0.00154776	0.0769	0.0029	0.06135	0.00285	0.01155	0.00125	0.10575	0.00315	0.09575	0.00225	0.1281	0.0015	0.0468	0.0016	0.0409	0.0021	0.0458	0.0016
X.phaseoli pv. syngonii and diffenbachiae	fuscans	0.0370857	0.00145153	0.0491	0.0009	0.02115	0.00275	0.21575	0.00695	0.0443	6.58545e-10	0.05025	0.00115	0.0625	0.0012	0.1886	0.0188	0.1073	0.0123305	0.1551	0	0.0967	0.01	0.10455	0.01075	0.039	0.0008	0.05015	0.00045	0.0919	0	0.08075	0.00295	0.0625	0.0029	0.01285	0.00125	0.10575	0.00315	0.10025	0.00375	0.12895	0.00226329	0.0444	0.0016	0.0427	0.0021	0.04265	0.00155
X.phaseoli pv. syngonii and diffenbachiae	X.citri pv. anacardii and aurantifolii	0.04205	0.00185	0.077175	0.00130839	0.0469	0.0021783	0.1986	0.0034	0.0434	0	0.0448	0.0012	0.0622	0.00155885	0.2015	0.0178052	0.13445	0.00936923	0.1503	0.0048	0.1033	0.0067	0.105425	0.00991372	0.039025	0.0010963	0.04925	0.00045	0.0933	0.0019799	0.0592	0.0145026	0.06365	0.0031197	0.013475	0.00142017	0.1026	0.0031	0.098	0.00237171	0.13145	0.00154029	0.0448	0.00164924	0.0427	0.00218403	0.04905	0.00191377
NF2	NF3	0.0023	0	0.0101	1.16415e-10	0.0198	2.32831e-10	0.0265	0	0.0059	0	0.0029	0	0	0	0.1952	0	0.0507	0	0.0118	0	0.0088	0	0.0118	0	0.0037	0	0.00446667	0.000377124	0.00163333	0.000612826	0.0071	0	0.0021	0	0	0	0.0055	1.00819e-10	0.0053	0	0.0051	0	0.0053	0	0.0034	4.1159e-11	0.005	5.82077e-11
NF2	fuscans	0.0160429	0.000139971	0.0553	0	0.0458	1.31709e-09	0.0211	0	0	0	0.0066	1.84069e-10	0.0033	9.20344e-11	0.1962	0	0.00494286	0.00181962	0.0118	0	0.0118	0	0.0055	0	0.0059	0	0.005	0	0.0025	0	0.0035	0	0.0032	0	0.0026	5.82077e-11	0.0055	0	0.0053	0	0.0444	0.000244949	0.003	0	0.0028	1.00819e-10	0.004	0
NF3	fuscans	0.0167571	0.000104978	0.0662	0	0.0408	1.54442e-09	0.0265	0	0.0059	0	0.0051	1.93053e-10	0.0033	9.20344e-11	0.0441	0	0.0504	0.00195959	0.0157	3.29272e-10	0.0029	4.1159e-11	0.011	0	0.0037	8.23181e-11	0.0061	0.000424264	0.00163333	0.000612826	0.0071	1.84069e-10	0.0053	0	0.0026	5.82077e-11	0.0055	0	0.0053	0	0.0471	0.000244949	0.0053	0	0.004	0	0.005	0
X.citri pv. anacardii and aurantifolii	NF2,NF3,fuscans	0.00988462	0.006658	0.0401885	0.0271093	0.0308269	0.0171334	0.0228308	0.00989766	0.0104231	0.00105331	0.00896923	0.00224444	0.00499231	0.00122911	0.0704577	0.0697717	0.0381423	0.0166958	0.0166731	0.00812667	0.00951538	0.00312037	0.00781538	0.00181483	0.00456154	0.00136891	0.00591154	0.00151869	0.00290769	0.00194539	0.0468154	0.0282289	0.00583462	0.00331928	0.00327308	0.0011089	0.0027	0	0.00602692	0.0023257	0.0284385	0.0183705	0.00352692	0.00128349	0.00542692	0.00100137	0.00834615	0.00240979
X.citri pv. anacardii and aurantifolii	NF2	0.0023	0	0.01265	0.00085	0.00645	0.00035	0.0052	0	0.011	2.32831e-10	0.0073	0	0.0044	0.0011	0.1948	0.0014	0.04905	0.00055	0.01975	0.00795	0.0148	0	0.0063	0	0.0066	0	0.00585	0.00165	0.0031	0.0019	0.04865	0.02725	0.00535	0.00105	0.0026	0	0.0027	0	0.00725	0.00065	0.0086	0.0003	0.0034	0.0004	0.0051	0.0006	0.00905	0.00205
X.citri pv. anacardii and aurantifolii	NF3	0.0031	0	0.00925	0.00085	0.01945	0.00035	0.0319	8.06549e-10	0.0085	0	0.0059	0	0.0044	0.0011	0.0068	0.0011	0.00785	0.00055	0.01575	0.00795	0.0059	0	0.011	0.0008	0.0029	0	0.00611667	0.000929904	0.00226667	0.00195761	0.0449	0.0271	0.00745	0.00105	0.0026	0	0.0027	0	0.00195	0.00065	0.0086	0.0003	0.0057	0.0004	0.00395	0.00055	0.006	0.002
X.citri pv. anacardii and aurantifolii	fuscans	0.0160429	0.000139971	0.06525	0.00095	0.04615	0.00035	0.0265	0	0.011	1.16415e-10	0.011	1.16415e-10	0.0055	0.0011	0.04445	0.00035	0.04645	0.00203531	0.01575	0.00795	0.0088	0	0.0071	1.16415e-10	0.0044	0.0007	0.00585	0.00165	0.0031	0.0019	0.04685	0.02905	0.00535	0.00425	0.00385	0.00125	0.0027	0	0.00725	0.00065	0.0454429	0.000411815	0.00265	0.00035	0.0062	1.42579e-10	0.00905	0.00205
NF1	X.phaseoli pv. manihotis	na	na	0.0553	0	0.5331	0	na	na	0.02014	0.000440908	0.01672	0.000342929	0.0613	0	0.0313	0	0.0722	0	0.1269	0	0.1134	1.86265e-09	0.1098	1.86265e-09	0.04472	0.000391918	0.0506	0	0.0713	0	0.0857	0	0.05708	0.00044	0.0116	0	0	0	0.104	0	0.01162	0.00024	0.0452	0	0.0057	0	0.04	0
NF1 and X.phaseoli pv. manihotis	X.phaseoli pv. syngonii and diffenbachiae	0.0408	0.0018	0.0535833	0.0179982	0.102392	0.189281	0.202	0.0068	0.019225	0.00409311	0.02065	0.00573345	0.055125	0.0165289	0.190325	0.0204593	0.124058	0.0262295	0.143367	0.0155034	0.0931667	0.0243154	0.097575	0.0239047	0.0353833	0.0105761	0.0449417	0.0116849	0.0844583	0.0171884	0.0732917	0.0213234	0.05335	0.0176427	0.012175	0.00449409	0.0279	0.0057	0.0872083	0.0294677	0.0267417	0.0018053	0.0402583	0.00938727	0.01725	0.00195512	0.037475	0.0116596
NF1	NF1	0	0	0	0	0	0	0	0	0.00048	0.000391918	0.00042	0.000342929	0	0	0	0	0	0	0	0	0	0	0	0	0.00042	0.000342929	0	0	0	0	0	0	0.00107	0.000813695	0	0	0	0	0	0	0.00024	0.000293939	0	0	0	0	0	0
NF2	NF2	0	0	0	0	0	0	0	0	0	0	0	0	0	0	0	0	0	0	0	0	0	0	0	0	0	0	0	0	0	0	0	0	0	0	0	0	0	0	0	0	0	0	0	0	0	0	0	0
NF3	NF3	0	0	0	0	0	0	0	0	0	0	0	0	0	0	0	0	0	0	0	0	0	0	0	0	0	0	0.000533333	0.000377124	0.0008	0.000565685	0	0	0	0	0	0	0	0	0	0	0	0	0	0	0	0	0	0
fuscans	fuscans	0.000114286	0.000180702	0	0	0	0	0	0	0	0	0	0	0	0	0	0	0.00148571	0.00234912	0	0	0	0	0	0	0	0	0	0	0	0	0	0	0	0	0	0	0	0	0	0	0.000171429	0.000271052	0	0	0	0	0	0
HGT event between the NF1 and the Nf2, NF3 and/or fuscans lineages and associated Ks values		NF2 to NF1		Undetected		fuscans to NF1		fuscans to NF1		Undetected		Undetected		fuscans to NF1		fuscans to NF1		Undetected		fuscans to NF1		fuscans to NF1		fuscans to NF1		fuscans to NF1		fuscans to NF1		fuscans to NF1		NF2 to NF1		NF2 to NF1		fuscans to NF1		Undetected		fuscans to NF1		Undetected		fuscans to NF1		Undetected		fuscans to NF1
HGT event between the Nf2, NF3 and/or fuscans lineages and associated Ks values		Undetected		Undetected		Undetected		Undetected		Undetected		Undetected		NF2 and NF3		Undetected		fuscans and NF2		Undetected		Undetected		Undetected		Undetected		Undetected		Undetected		fuscans and NF2		Undetected		NF2 and NF3		Undetected		Undetected		Undetected		Undetected		Undetected		Undetected
Pairwise Ks values were calculated between strains from the lineages and/or pathovars listed in column 1 versus column 2
CDS are identified by accession numbers from strain CFBP6546 in bold.
The different fractions from each recombinant CDS are indicated by different letters (a, b or c) at the end of CDS accession numbers
HGT: Horizontal Gene Transfer
SD: Standard Deviation
na: not applicable due to the absence of corresponding CDS in one lineage or another
[truncated: 190 more columns]
