# Supplementary material for: Horizontal gene transfer plays a major role in the pathological convergence of Xanthomonas lineages on common bean
Source: BMC Genomics. 2018 Aug 13;19:606. doi: 10.1186/s12864-018-4975-4 (PMC6090828; doi:10.1186/s12864-018-4975-4)
Supplement: Supplementary file 4 — CheckM analysis of the genomes sequenced in this study. (XLSX 11 kb) [file 12864_2018_4975_MOESM4_ESM.xlsx]

## Sheet: Checkm_lineage_NC
Additional file 4: CheckM analysis of the genomes sequenced in this study.
Bin	Completeness (%)	Contamination (%)
axanac2913	99.64	0.36
axmang5610	100.00	0.00
axmang8127	100.00	0.00
oryzicBA15	99.52	0.00
oryzicBA20	99.28	0.00
oryzicBA21	98.91	0.00
pha1GL6164	93.91	0.00
pha1GL6546	99.64	0.00
pha1GL6984	99.28	0.36
pha1GL7430	99.64	0.00
pha1GLC412	99.28	0.00
pha2GL6988	100.00	0.00
pha2GL6990	100.00	0.00
pha2GL6991	100.00	0.00
pha3GL6992	99.64	2.90
pha3GL6994	94.42	0.00
pha3GL6996	99.64	0.00
phafus1815	99.64	0.00
phafus6166	99.64	0.18
phafus6960	99.64	0.20
phafus6970	99.64	0.00
phafus7766	99.28	0.18
phafus7767	99.64	0.00
